# Supplementary material
Source: PubMed Central journal article supplement (PMC6920609)
Supplement: NIHMS1531127-supplement-7.pdf [file NIHMS1531127-supplement-7.pdf]

**Supplementary Table S1. Primer sequences used in quantitative real-time PCR analysis**

| Gene           | Forward                          | Reverse                       | Entrez ID      |
|----------------|----------------------------------|-------------------------------|----------------|
| <b>ACTB</b>    | GAAAATCTGGCACCACACCT             | GATAGCACAGCCTGGATAGCAA        | NM_001101.3    |
| <b>AKR1C2</b>  | CCTAAAAGTAAAGCTCTAGAGGCCGT       | GAAAATGAATAAGATAGAGGTCAACATAG | NM_001354.5    |
| <b>AKR1C3</b>  | GAGAAGTAAAGCTTTGGAGGTCACA        | CAACCTGCTCCTCATTATTGTATAAATGA | NM_003739.5    |
| <b>AR</b>      | ATCCTCATATGGCCCAGTGTCAAG         | GCTCTCTAAACTTCCCGTGGCATA      | NM_000044      |
| <b>ARv7</b>    | CCATCTTGTGCTCTTCGGAAATGTTATGAAGC | TTTGAATGAGGCAAGTCAGCCTTTCT    | NM_001348061.1 |
| <b>BRCA1</b>   | GTCCCATCTGTCTGGAGTTGAT           | TCCAAACCTGTGTCAAGCTG          | NM_007294.3    |
| <b>BRCA2</b>   | ACTCTGCCGCTGTACCAATC             | GGTGTCTGACGACCCTTCAC          | NM_000059.3    |
| <b>CDKN1A</b>  | TGTCACTGTCTTGTACCCTTGTG          | CTTCCTCTTGGAGAAGATCAGCC       | NM_000389.4    |
| <b>E2F1</b>    | AAGAAGTCCAAGAACCACATCCA          | GCTGCGTAGTACAGATATTCATCA      | NM_005225.2    |
| <b>E2F2</b>    | GCTACTGCTACCTACTACACACC          | CTCCAGATCCAGCTTCCTTTTGG       | NM_004091.3    |
| <b>HSD17B6</b> | GCTTTCTTTGTAGGAGGCTACTGTG        | TCCTTAATATGCTTGGGGGCTTCT      | NM_003725.3    |
| <b>MYBL2</b>   | TCTGAACTTCTGGAACAAACAGGA         | TGGAGTACTTCTGATCTGGGGTTA      | NM_002466.3    |
| <b>MYC</b>     | CTACCCTCTCAACGACAGCAG            | TGCCTCTTTTCCACAGAAACAAC       | NM_002467.4    |
| <b>SRD5A1</b>  | CCTGTTGAATGCTTCATGACTTG          | TAAGGCAAAGCAATGCCAGATG        | NM_001047.3    |
| <b>SRD5A2</b>  | CTCTCTAAGGAAGGGGCCGAAC           | GACAATGCATTCCGCAAACATA        | NM_000348.3    |
| <b>TOP2A</b>   | TGGAAGTGTACCATTGCAG              | CCCTTTGTTTGTGTCCGCA           | NM_001067.3    |
| <b>UGT2B15</b> | CGTTGTGCACATGTACCCTAAAA          | CCATGTTACATTTTCCTTCCTG        | NM_001076.3    |
