# Supplementary material
Source: PubMed Central journal article supplement (PMC6920609)
Supplement: NIHMS1531127-supplement-8.pdf [file NIHMS1531127-supplement-8.pdf]

**Supplementary Table S2. PDX and patient clinical information**

| LuCaP      | Date of Transplant | Tissue Implanted                       | CR subline establishment | Passage used | Age at Diagnosis | Gleason Score of Primary | Time with disease (Yr) | Androgen Ablation | CRPC | Patient Treatments                                                                       |
|------------|--------------------|----------------------------------------|--------------------------|--------------|------------------|--------------------------|------------------------|-------------------|------|------------------------------------------------------------------------------------------|
| LuCaP 23.1 | 1991               | LN Metastasis                          | 2013                     | 27           | NA               | NA                       | NA                     | NA                | NA   | NA                                                                                       |
| LuCaP 35   | 1993               | LN Metastasis                          | 2001                     | 73           | 65               | 5+5                      | 1                      | Y                 | Y    | Lupron, Orchiectomy, Futamide, Cytozan, 5-FU                                             |
| LuCaP 70   | 1997               | Liver Metastasis                       | 2011                     | 21           | 59               | 3+4                      | 5                      | Y                 | Y    | Corticosteroids, DES, Strontium-89                                                       |
| LuCaP 73   | 1997               | RRP                                    | 2011                     | 13           | 47               | 4+5                      | 1.9                    | Y                 | Y    | Strontium-89, Ketoconazole, Corticosteroids, DES                                         |
| LuCaP 77   | 1998               | Femur Metastasis                       | 2010                     | 28           | 65               | NA                       | 15.4                   | Y                 | Y    | Flutamide, Orchiectomy, Mitoxantrone, DES, XRT,                                          |
| LuCaP 78   | 1998               | LN Metastasis                          | 2011                     | 9            | 52               | 7                        | 6.5                    | Y                 | Y    | Taxotere, Ketoconazole, Corticosteroids, Mitoxantrone, DES                               |
| LuCaP 86.2 | 1999               | Bladder Metastasis                     | 2010                     | 1            | 65               | NA                       | 14.1                   | Y                 | Y    | Lupron, Flutamide                                                                        |
| LuCaP 96   | 1999               | TURP<br>Rib Metastasis                 | 1004                     | 42           | 61               | 5+4                      | 0.5                    | Y                 | N    | Lupron, Biclutamide                                                                      |
| LuCaP 105  | 2000               |                                        | 2010                     | 18           | 48               | 5+3                      | 5.1                    | Y                 | Y    | Flutamide, Lupron, Taxotere, Ketoconazole, Mitoxantrone, Cytozan, 5-FU, Bisphosphonates  |
| LuCaP 136  | 2004               | Cells from Ascites<br>Liver Metastasis | 2012                     | 17           | 62               | 5+5                      | 0.6                    | Y                 | Y    | Lupron, Casodex                                                                          |
| LuCaP 147  | 2005               |                                        | 2010                     | 25           | 67               | 4+5                      | 2.2                    | Y                 | Y    | Casodex, Lupron, XRT, DES, Taxotere, Ketoconazole, Corticosteroids, DES, Bisphosphonates |
| LuCaP 167  | 2012               |                                        | 2013                     | 15           | 71               | 4+5                      | 6.3                    | Y                 | Y    | Casodex, Lupron, Dutasteride, Nilutamide, Ketoconazole, Corticosteroids, Abiraterone     |
| LuCaP 176  | 2013               | Rib Metastasis                         | 2017                     | 1            | 56               | 4+5                      | 5.86                   | Y                 | Y    | Lupron, Lupron + Casodex XRT, Corticosteroids, Abiraterone, Enzalutamide, etoposide      |

Note: Passage used = 1 when CR tumor was developed from fresh castration prior to the SPT study

**Abbreviations:**

|      |                                     |
|------|-------------------------------------|
| TAN  | Tissue acquisition necropsy         |
| DES  | Diethyl stilbestrol                 |
| LN   | Lymph node                          |
| NA   | Not available                       |
| OR   | Operating room                      |
| RRP  | Radical prostatectomy               |
| TURP | Transurethral resection of prostate |
| XRT  | Radiation                           |
